# Supplementary material for: The Impact of Diagnostic Ureteroscopy Prior to Radical Nephroureterectomy on Oncological Outcomes in Patients with Upper Tract Urothelial Carcinoma: A Comprehensive Systematic Review and Meta-analysis
Source: Preprints.org preprint supplement (doi:10.20944/preprints202107.0387.v1), 2021-07-16
Supplement: Supplementary file 1 [file supplementary]

**Supplementary Table 2.** Characteristics of intravesical recurrences in included studies

| **Author**, **year** [reference] | **Group** | **Number of intravesical recurrences, n** (%) | **Pathological stage of bladder recurrence** | **Pathological grade of bladder recurrence** |
| --- | --- | --- | --- | --- |
| **Baboudjian** *et al.*  2020 [11] | **URS (+)**  n = 70 | 41 (59.0)* | <T2: 41 (100.0)  ≥T2: 0 (0.0) | LG: 23 (56.1)  HG: 18 (43.9) |
| **URS (-)**  n = 23 | 6 (26.0) | <T2: 6 (100.0)  ≥T2: 0 (0.0) | LG: 4 (66.7)  HG: 2 (33.3) |
| **Chung** *et al.*  2020 [13] | **URS (+)**  n = 226 | 99 (43.8)* | NR | NR |
| **URS (-)**  n = 227 | 61 (26.9) | NR | NR |
| **Ishikawa** *et al.*  2010 [15] | **URS (+)**  n = 55 | NA | NR | NR |
| **URS (-)**  n = 153 | NA | NR | NR |
| **Izol** *et al.*  2021 [16] | **URS (+)**  n = 95 | 37 (38.9)* | NR | NR |
| **URS (-)**  n = 99 | 17 (17.2) | NR | NR |
| **Lee HY** *et al.*  2018 [17] | **URS (+)**  n = 206 | NA | NR | NR |
| **URS (-)**  n = 296 | NA | NR | NR |
| **Lee JK** *et al.*  2016 [18] | **URS (+)**  n = 74**#** | 29 (39.2)* | NR | NR |
| **URS (-)**  n = 30 | 5 (16.7) | NR | NR |
| **Liu** *et al.*  2016 [19] | **URS (+)**  n = 81 | NA | NR | NR |
| **URS (-)**  n = 583 | NA | NR | NR |
| **Luo** *et al.*  2013 [20] | **URS (+)**  n = 115 | 47 (40.9)* | NR | NR |
| **URS (-)**  n = 281 | 78 (27.8) | NR | NR |
| **Ma** *et al.*  2019 [21] | **URS (+)**  n = 110 | NA | NR | NR |
| **URS (-)**  n = 53 | NA | NR | NR |
| **Sankin** *et al.*  2016 [23] | **URS (+)**  n = 144 | NA | NR | NR |
| **URS (-)**  n = 57 | NA | NR | NR |
| **Sharma** *et al.*  2021 [24] | **URS (+)**  n = 567**##** | 157 (27.7) | <cT2: 147 (93.6)*  ≥cT2: 10 (6.4) | NR |
| **URS (-)**  n = 210 | 47 (22.4) | <cT2: 37 (78.7)  ≥cT2: 10 (21.3) | NR |
| **Sung** *et al.*  2015 [25] | **URS (+)**  n = 282 | NA | NR | NR |
|  | **URS (-)**  n = 348 | NA | NR | NR |
| **Yoo** *et al.*  2017 [26] | **URS (+)**  n = 69 | NA | NR | NR |
|  | **URS (-)**  n = 318 | NA | NR | NR |

**#**  data is presented for patients who underwent URS regardless of following RNU time

**##**  data is presented for patients who underwent URS regardless of biopsy status

***** statistically significant difference between URS (+) and URS (-) groups

**Abbreviations**: **NA =** not applicable; **NR =** not reported; **URS =** ureteroscopy
