# Supplementary material for: The Impact of Diagnostic Ureteroscopy Prior to Radical Nephroureterectomy on Oncological Outcomes in Patients with Upper Tract Urothelial Carcinoma: A Comprehensive Systematic Review and Meta-analysis
Source: Preprints.org preprint supplement (doi:10.20944/preprints202107.0387.v1), 2021-07-16
Supplement: Supplementary file 3 [file Supplementary Table 1.docx]

**Supplementary Table 1.** Technical details of ureteroscopy and radical nephroureterectomy in included studies

| **Author, year**  [reference] | **URS technique** | **Time between URS and RNU** | **Surgical approach** | **Bladder cuff excision** |
| --- | --- | --- | --- | --- |
| **Baboudjian** *et al.*  2020 [11] | Flexible URS  Use of Peel-Away ureteral sheath Ch 9–10, drainage with mono-J and bladder catheter | Mean 47 days | Open/laparoscopic RNU | URS (+): 70/70 (100%)  URS (-) : 23/23 (100%) |
| **Boorjian** *et al.*  2005 [12] | Rigid URS | Mean 28 days | Open/laparoscopic RNU | NR |
| **Chung** *et al.*  2020 [13] | Flexible/rigid URS | NR | Open/laparoscopic/robotic RNU | URS (+): 226/226 (100%)  URS (-) : 227/227 (100%) |
| **Hendin** *et al.*  1999 [14] | Rigid URS | NR | NR | URS (+): 48/48 (100%)  URS (-): 48/48 (100%) |
| **Ishikawa** *et al.*  2010 [15] | Flexible/rigid URS | NR | Open/laparoscopic RNU | URS (+): 55/55 (100%)  URS (-): 153/153 (100%) |
| **Izol** *et al.*  2021 [16] | Flexible/rigid URS | Median 30 days | Open/laparoscopic/robotic RNU | URS (+): 95/95 (100%)  URS (-): 99/99 (100%) |
| **Lee HY** *et al.*  2018 [17] | NR | NR | Open/laparoscopic RNU, segmental resection | URS (+): 206/206 (100%)  URS (-): 296/296 (100%) |
| **Lee JK** *et al.*  2016 [18] | NR | Group 1: Same day  Group 2: Median 5 days | Open/laparoscopic/robotic RNU | NR |
| **Liu** *et al.*  2016 [19] | NR | NR | Open/laparoscopic RNU | URS (+): 81//81 (100%)  URS (-): 583/583 (100%) |
| **Luo** *et al.*  2013 [20] | Rigid URS | NR | NR | URS (+): 115/115 (100%)  URS (-): 281/281 (100%) |
| **Ma** *et al.*  2019 [21] | Flexible/rigid URS | NR | Open/laparoscopic | NR |
| **Nison** *et al.*  2013 [22] | Rigid URS | Median 79.5 days | Open/laparoscopic RNU | NR |
| **Sankin** *et al.*  2016 [23] | NR | Median 35 days | NR | NR |
| **Sharma** *et al.*  2021 [24] | NR | NR | NR | URS (+): 452/567 (79.7%)*****  URS (-) : 101/210 (48.1%) |
| **Sung** *et al.*  2015 [25] | Flexible/rigid URS | Median 16 days | Open/laparoscopic RNU | URS (+): 282 (100%)  URS (-): 348 (100%) |
| **Yoo** *et al.*  2017 [26] | Semi-rigid/flexible URS | NR | Open/laparoscopic/robotic RNU | URS (+): 69/69 (100%)  URS (-): 318/318 (100%) |

***** Statistically significant difference between URS (+) and URS (-) groups

**Abbreviations: Ch** = Charriere**; NR** = not reported; **RNU =** radical nephroureterectomy; **URS** = ureteroscopy
